# Supplementary material
Source: publisher site journal article supplement (https://www.dovepress.com/article/417123)
Supplement: Supplementary file 1 [file get_supplementary_file.php]

Supplementary Table 1 The basic characteristics of the study cohorts

| Author | Publication year | PMID number | Outcome | Sample size | Patient type | Patient stage | Therapy | Data source | Risk factors | Statistical methods | Validation | C-index /AUC* |
| --- | --- | --- | --- | --- | --- | --- | --- | --- | --- | --- | --- | --- |
| Sheng R1 | 2023 | 36270416 | Therapeutic response prediction | 35 | Including patients with hepatitis virus HCC (HBV) | Advanced patients | Combined targeted immunotherapy | Hospital-based | Homogeneous signal, No arterial peritumoral enhancement | Multivariable logistic regression | Absent | 0.837/0.837* |
| Li W2 | 2022 | 36213823 | RFS | 302 (training cohort 211, validation cohort 91) | Including patients with hepatitis virus HCC (HBV and HCV) | - | Hepatectomy | Hospital-based | Two-trait predictor of venous invasion, Rim enhancement, Tumor capsule, A fusion radiomics signature | LASSO Cox regression | Absent | 0.91* |
| Liu H3 | 2022 | 36160021 | PFS | 54 | Including patients with hepatitis virus HCC (HBV) | Child-Pugh grade A or B; BCLC stage B or C | Camrelizumab | Hospital-based | Hepatitis virus, AFP, Vascular invasion | Multivariable Cox regression | Absent | 0.781 |
| Jin Z4 | 2022 | 36147869 | OS | 374 | Including patients with hepatitis virus HCC (HBV and HCV) | AJCC stage I-IV | - | TCGA | AJCC N stage, AJCC M stage, Gender, Age, A 14-prognostic cuproptosis-related miRNAs signature, Pathological stage | LASSO Cox regression | Absent | - |
| Zhang S5 | 2022 | 36110988 | PER (recurrence within 2 years after resection) | 433 (Training cohort 347, validation cohort 86) | Including patients with hepatitis virus HCC (HBV) | - | Hepatectomy | Hospital-based | AFP, GGT, Glisson’s capsule invasion, Microvascular invasion, Satellite lesions | Multivariable logistic regression | Absent | 0.693 |
| Yan H6 | 2022 | 36042905 | OS | 269 | Including patients with hepatitis virus HCC (HBV) | AJCC stage I-III | Hepatectomy | Hospital-based | Vascular invasion, Tumor size, M stage (TNM), Prealbumin-to-fibrinogen ratio | Multivariable Cox regression | Absent | 0.715 |
| Wang K7 | 2022 | 36001229 | OS | 193 (training cohort 130, validation cohort 63) | Including patients with hepatitis virus HCC (HBV) | BCLC stage 0-B | Radical resection | Hospital-based | Maximal microvascular invasion area, Tumor diameter, Microvascular invasion stage, Liver cirrhosis | Multivariable Cox regression | Present | 0.7665 (1-yr)* 0.7359 (3-yr)* 0.7580 (5-yr)* |
| Shan Y8 | 2022 | 35974953 | Probability of macrotrabecular-massive subtype | 267 | Including patients with hepatitis virus HCC (HBV) | Edmondson-Steiner grade I-IV | Radical resection | Hospital-based | AST, Prothrombin time, AFP | LASSO logistic regression | Absent | 0.723/0.723* |
| Tao H9 | 2022 | 35919033 | OS | 370 | Including patients with hepatitis virus HCC (HBV and HCV) | AJCC stage I-IV | - | TCGA | MPV17 | Multivariable Cox regression | Absent | 0.636 |
| Zhang H10 | 2022 | 35854221 | Risk of early death of stage IVA, risk of early death of stage IVB (Death that occurred within 3 months of initial diagnosis is defned as early death) | 6603 | Lack of data on hepatitis virus infection profile | AJCC stage IV | - | SEER | Risk of early death of stage IVA: Age, Tumor size, Histological grade, AFP, Fibrosis score, T stage, Surgery, Radiotherapy, Chemotherapy Risk of early death of stage IVB: Age, Histological grade, AFP, T stage, N stage, Bone metastasis, Lung metastasis, Surgery, Radiotherapy, Chemotherapy | Multivariable logistic regression | Absent | AJCC stage IVA: 0.820/ 0.830*; AJCC stage IVB: 0.785/0.789* |
| Ji K11 | 2022 | 35698645 | OS | 335 (training cohort 189, internal validation cohort 79, external validation cohort 67) | Including patients with hepatitis virus HCC (HBV) | Patients with unresectable HCC | TACE | Hospital-based | AFP, Child-Pugh class, Tumor diameter, Tumor number, Tumor extent, Portal vein invasion (PVTT) | Multivariable Cox regression | Present | 0.735 (internal validation set), 0.854 (external validation set) |
| Fang T12 | 2022 | 35686100 | RFS | 133 | Including patients with hepatitis virus HCC (HBV) | BCLC stage A or B | Radical resection | Hospital-based | Splenic volume | Multivariable Cox regression | Absent | - |
| Fu Y13 | 2022 | 35674872 | RFS | 258 (training cohort 172, validation cohort 86) | Including patients with hepatitis virus HCC (HBV) | Child-Pugh grade A | Hepatectomy | Hospital-based | TNM Stage, A 9-ctDNAs signature | Multivariable Cox regression | Present | 0.76 |
| Gu J14 | 2022 | 35637856 | OS, RFS | 636 | Including patients with hepatitis virus HCC (HBV) | Child-Pugh grade A; BCLC stage 0-C | Hepatectomy | Hospital-based | OS: Cirrhotic severity scoring, Albumin-bilirubin, Tumor number, Tumor size, Macrovascular invasion RFS:Cirrhotic severity scoring, AFP, Albumin-bilirubin, Tumor number, Tumor size, Macrovascular invasion | Multivariable Cox regression | Absent | 0.732, 0.696 |
| Dai K15 | 2022 | 35513781 | OS | 424 | Including patients with hepatitis virus HCC (HBV and HCV) | AJCC stage I-IV | - | TCGA | T stage, A 17-immune infltration-related genes signature, Tumor status | LASSO Cox regression | Absent | 0.692/ 0.755 (1-yr)* 0.781 (3-yr)* 0.832 (5-yr)* |
| Liu H16 | 2022 | 35444459 | OS | 373 | Including patients with hepatitis virus HCC (HBV and HCV) | AJCC stage I-IV | - | TCGA | T stage, M stage, HSPB11 | Multivariable Cox regression | Absent | - |
| Yang Y17 | 2022 | 35436411 | OS | 220 | Including patients with hepatitis virus HCC (HBV) | AJCC stage I-III | - | GSE14520 | LMNB1, Ki67, BCLC Stage | Multivariable Cox regression | Absent | 0.728 (3-yr)* 0.768 (5-yr)* |
| Yan H18 | 2022 | 35399712 | OS | 1135 (training cohort796, validation cohort339) | Including patients with hepatitis virus HCC (HBV) | Child-Pugh grade A or B; BCLC stage 0-C | TACE | Hospital-based | BCLC Stage, Transarterial chemoembolization, Tumor size, GGT, AFP, CRP | Multivariable logistic regression | Absent | 0.817 |
| Xu X19 | 2022 | 35267069 | Risk of microvascular invasion | 156 | Lack of data on hepatitis virus infection profile | - | Hepatectomy or liver transplantation | Hospital-based | Tumor size, Tumor margin, Satellite nodules, Peritumoral enhancement, Neutrophils to lymphocytes ratio, Prognostic nutritional index | Multivariable logistic regression | Absent | 0.868* |
| Zhang X20 | 2022 | 35249443 | RFS | 700 (training cohort466, validation cohort234) | Including patients with hepatitis virus HCC (HBV and HCV) | Child-Pugh grade A or B; ALBI grade 1 or 2 | RFA | Hospital-based | Aspartate aminotransferase-to-platelet ratio index, Tumor number, Gender | Multivariable Cox regression | Present | 0.808/  0.842 (3-yr)* 0.820 (4-yr)*  0.790 (5-tr)* |
| Chen X21 | 2022 | 35223515 | Risk of regional lymph node metastasis | 1346 (training cohort 673, validation cohort 673) | Lack of data on hepatitis virus infection profile | AJCC stage I-IV | - | SEER | Race, Tumor size, Clinical T stage, Extrahepatic bile duct invasion, Tumor grade | LASSO logistic regression | Absent | 0.862* |
| Zhou T22 | 2022 | 35122925 | OS | 367 | Including patients with hepatitis virus HCC (HBV and HCV) | AJCC stage I-IV | - | TCGA | Age, AJCC T stage, A 3-pyroptosis genes signature (GPX4, NLRP1 and NLRP6 ) | LASSO Cox regression | Absent | 0.7 (1-yr)* 0.677 (3-yr)*  0.723 (5-tr)* |
| Xin Y23 | 2021 | 35070419 | RFS | 445 (training cohort 302, validation cohort 143) | Including patients with hepatitis virus HCC (HBV) | Early-stage HBV-related HCC patients | RFA | Hospital-based | Age-male-albumin-bilirubin-platelets score, Tumor number, HBV DNA level | Multivariable Cox regression | Present | 0.82 (3-yr)* 0.83 (4-yr)* 0.77 (5-yr)* |
| Wang H24 | 2021 | 35004273 | Risk of microvascular invasion | 381 (training cohort 267, validation cohort 114) | Including patients with hepatitis virus HCC (HBV and HCV) | - | Hepatectomy | Hospital-based | AFP, Lymphocyte, VEGFA, Peritumoral enhacement, Tumor shape, Intratumoral artery | Multivariable logistic regression | Absent | 0.948 |
| Sun T25 | 2021 | 34611429 | Risk of HCC | 5666 (training cohort 3966, validation cohort 1700) | Including patients with hepatitis virus HCC (HBV) | - | - | Hospital-based | Gender, Age, ALT, International normalized ratio, Total bilirubin, AFP, PIVKA-II | Multivariable logistic regression | Absent | 0.914* |
| Ye D26 | 2021 | 34552865 | PFS | 113 (training cohort 78, validation cohort 35) | Including patients with hepatitis virus HCC (HBV) | Advanced patients | TACE and RFA | Hospital-based | BCLC stage, AFP, Time interval, A 8-radiomics features signature | LASSO Cox regression | Absent | 0.722 |
| Wang Z27 | 2021 | 34423480 | OS | 325 (training cohort 116, internal validation cohort 119, external validation cohort 90) | Including patients with hepatitis virus HCC (HBV and HCV) | AJCC stage I-IV | - | TCGA and Hospital-based | Lymph node metastasis, A 3-metabolic rate-limiting enzymes signature (RRM1, UCK2 and G6PD) | Multivariable Cox regression | Absent | 0.852* |
| Zheng Y28 | 2021 | 34414679 | CSS (cancer- specific survival), OS | 33670 (training cohort 23,570, validation cohort 10,100) | Lack of data on hepatitis virus infection profile | AJCC stage I-IV | - | SEER | CSS: Age, Race, Gender, Tumor number, Tumor size, Fibrosis score, AFP, T stage, N stage, M stage, Lung metastasis, Regional lymph nodes, Surgery, Surgery for regional lymph node, Chemotherapy, Cost- of- living index, Insurance, marital status, poverty rate OS:Age, Race, Gender, Tumor number, Tumor size, Fibrosis score, AFP, T stage, N stage, M stage, Lung metastasis, Regional lymph nodes, Surgery, Surgery for regional lymph node, Chemotherapy, Cost- of- living index, Insurance, marital status, poverty rate | Multivariable Cox regression | Absent | CSS: 0.789/0.862 (1-yr)*, 0.851 (3-yr)*, 0.856 (5-yr)*; OS:0.675/0.847 (1-yr)*, 0.838 (3-yr)*, 0.845 (5-yr)* |
| Chen Y29 | 2021 | 34322456 | Risk of deep vein thrombosis | 355 (training cohort243, validation cohort112) | Including patients with hepatitis virus HCC | HCC with no distant metastasis | Laparoscopic hepatectomy | Hospital-based | Age, Gender, BMI, Comorbidities, Operative position | Multivariable logistic regression | Absent | 0.861* |
| Zheng Y30 | 2021 | 34295559 | OS | 328 (training cohort 111, internal validation cohort 73, external validation cohort 240) | Including patients with hepatitis virus HCC (HBV and HCV) | AJCC stage I-IV | - | TCGA and ICGC | A 7-gene signature (ZNF7, TRAPPC9, TMEM65, POU5F1B, DEPTOR, BOP1and ARHGAP39), Tumor stage | LASSO Cox regression | Absent | - |
| Lu Z31 | 2021 | 34187430 | OS, CSS | OS: 3142 (training cohort 2,202, validation cohort 940), CSS: 2703 (training cohort 1,895, validation cohort 808) | Lack of data on hepatitis virus infection profile | AJCC stage I-IV | RFA | SEER | OS: Marital status, Age, Race, Differentiated grade, T stage, M stage, Tumor size, AFP CSS: Marital status, Age, Race, Differentiated grade, T stage, Tumor size, AFP | Multivariable Cox regression | Absent | 0.637/0.670 |
| Yang M32 | 2021 | 34047468 | OS | 455 (training cohort 260, internal validation cohort 134, external validation cohort 61) | Including patients with hepatitis virus HCC (HBV and HCV) | BCLC stage 0-C | Liver resection | Hospital-based | Age, Tumor size, Albumin, Tumor embolus, COMMD10 | Multivariable Cox regression | Present | 0.592 |
| Li L33 | 2021 | 34027555 | OS | 295 | Including patients with hepatitis virus HCC (HBV and HCV) | AJCC stage I-IV | Immunotherapy | TCGA | A 3-m6A methyltransferase-related lncRNAs signature (LINC02362, SNHG20 andSNHG6) | LASSO Cox regression | Absent | - |
| Liao C34 | 2021 | 34012658 | OS, RFS | 727 (training cohort 452, validation cohort 275) | Including patients with hepatitis virus HCC (HBV) | AJCC stage1-IV, BCLC stage 0-C | Radical resection | Hospital-based | OS: SOLMR grade (sarcopenic obesity and lymphocyte‐monocyte ratio), AFP, AJCC stage RFS: SOLMR grade (sarcopenic obesity and lymphocyte‐monocyte ratio), AFP, AJCC stage | Multivariable Cox regression | Present | 0.761, 0.736 |
| Li TE35 | 2021 | 33854587 | OS | 220 (training cohort 105, validation cohort 115) | Including patients with hepatitis virus HCC (HBV) | AJCC stages I-IV，BCLC stage 0-C | Postoperative adjuvant TACE | Hospital-based | Immuenotype, PD-L1 expression, Tumor grade, BCLC stage | Multivariable Cox regression | Absent | 0.794 |
| Ma E36 | 2021 | 33850865 | RFS | 210 (training cohort 140, validation cohort 70) | Including patients with hepatitis virus HCC | Grade I-III | Liver transplantation | Hospital-based | Age, Tumor diameter, Tumor thrombus, Microvascular invasion, ALT, AFP | Multivariable Cox regression | Absent | 0.796/ 0.732 (1-yr)* 0.705 (2-yr)* |
| Bai Y37 | 2021 | 33688256 | OS | 5866 (training cohort 3567, internal validation cohort 1783, external validation cohort 516) | Including patients with hepatitis virus HCC (HBV) | AJCC stage I or II | Liver resection | SEER and hospital-based | Tumor size,Tumor number, Microvascular invasion, Grade of histologic differentiation | Multivariable Cox regression | Present | 0.63 /0.68 (1-yr)*, 0.66 (3-yr)*, 0.63 (5-yr)* |
| Zeng H38 | 2022 | 33653241 | OS | 368 (training cohort 313, internal validation cohort 55) | Including patients with hepatitis virus HCC (HBV and HCV) | AJCC stage I-IV | - | TCGA | Tumor stage, A 4-DNA repair-associated lncRNA signature (AP002478.1, AC116351.1, LINC02580, and LINC00861) | LASSO COX regression | Absent | - |
| Dai T39 | 2021 | 33553305 | Overall RFS, early RFS, late RFS | 383 | Including patients with hepatitis virus HCC (HBV) | BCLC stage 0-C | Liver resection | Hospital-based | Overall RFS: Tumor diameter, Tumor number, Pathological differentiation, Fibrinogen, lymphocyte-to-monocyte ratio, S-index Early RFS: Tumor diameter, Tumor number, Pathological differentiation, Fibrinogen, lymphocyte-to-monocyte ratio, S-index Late RFS: Tumor number, Child-Pugh grade, S-index | Multivariable Cox regression | Absent | 0.679/0.739*  0.677/0.724*  0.728/0.753* |
| Yan B40 | 2021 | 33280269 | CSS (cancer-specific survival) | 3620 (training Cohort 2536, validation cohort 1084) | Lack of data on hepatitis virus infection profile | Early HCC（T1/T2, N0, and M0） | - | SEER | Age, Race, Grade, T stage, Surgery, Chemotherapy, Tumor size, Marital status | Multivariable Cox regression | Absent | 0.755/0.783 (3-yr)*, 0.779 (5-yr)* |
| Zhou Y41 | 2020 | 33241008 | OS, RFS | 591 | Lack of data on hepatitis virus infection profile | Child-Pugh grade A or B, ALBI grade 1 -3 | Percutaneous thermal ablation | Hospital-based | OS: Tumor number, AFP, Liver function, GGT RFS: Early recurrence, Tumor number, Liver function | Multivariable Cox regression | Absent | 0.69, 0.81 |
| Zhang Q42 | 2020 | 33232580 | OS | 374 | Including patients with hepatitis virus HCC (HBV and HCV) | AJCC stage I-IV | - | TCGA | Tumor stage, A 3-gene signature (CRNDE, MYLK-AS1 and CHEK1) | Multivariable Cox regression | Absent | 0.704/0.751 (1-yr)*, 0.773 (3-yr)*, 0.734 (5-yr)* |
| Yang J43 | 2020 | 33163397 | RFS | 303 (training cohort 238, validation cohort 65) | Including patients with hepatitis virus HCC (HBV and HCV) | AJCC stage1-IV, BCLC stage 0-C | Partial hepatectomy | Hospital-based | Age, AFP, Tumor size, Satellite nodules, Systemic immune inflammation, Prognostic nutrition index | Multivariable Cox regression | Absent | 0.701/0.706 (1-yr)*, 0.716 (3-yr)* |
| Zeng J44 | 2020 | 33145280 | OS, RFS | 3071 (training cohort 2020, validation cohort 1051) | Including patients with hepatitis virus HCC (HBV) | Edmondson-Steiner grade I-IV | Radical resection | Hospital-based | OS: AFP, Resection margin, Tumor size, Tumor number, Edmondson grade, Microvascular invasion, Platelet-to-lymphocyte ratio (PLR), γ-glutamyl transpeptidase-to-platelet ratio (GPR), Neutrophil times γ-glutamyl transpeptidase-to-lymphocyte ratio (NrLR) RFS: AFP, Albumin-bilirubin (ALBI), Tumor size, Tumor number, Edmondson grade, Microvascular invasion, Prognostic nutritional index (PNI), NrLR, GPR, Hepatitis, PLR | Multivariable Cox regression | Absent | OS: 0.71/0.80 (1-yr)*, 0.75 (3-yr)*, 0.75 (5-yr)* RFS: 0.71/0.78 (1-yr)*, 0.77 (3-yr)*, 0.78 (5-yr)* |
| Shi JY45 | 2021 | 33067168 | Risk of pre--hepatectomy liver failure, risk of post-hepatectomy liver failure | 767 | Including patients with hepatitis virus HCC (HBV and HCV) | Child-Pugh grade A or B | Hepatectomy | Hospital-based | Risk of pre--hepatectomy liver failure: Cirrhosis, Portal hypertension, Albumin-bilirubin (ALBI), Aspartate aminotransferase to platelet count ratio index (APRI), Largest tumor size Risk of post-hepatectomy liver failure: Cirrhosis, Portal hypertension, Albumin-bilirubin (ALBI), Aspartate aminotransferase to platelet count ratio index (APRI), Major hepatectomy, Intraoperative blood transfusion | Multivariable logistic regression | Absent | 0.789*, 0.844* |
| Zhou C46 | 2020 | 33042616 | OS, RFS | 154 | Including patients with hepatitis virus HCC (HBV) | BCLC stage 0-C; AJCC stage I-IV | Hepatectomy | Hospital-based | RPS3A, AFP, Ascites, Tumor size, TNM stage | Multivariable Cox regression | Absent | 0.701, 0.702 |
| Lai Y47 | 2020 | 32875573 | Preoperative DFS, postoperative DFS | 698 | Including patients with hepatitis virus HCC (HBV and HCV) | Child-Pugh grade A-C, Edmondson-Steiner grade I-IV | Radical resection | Hospital-based | Preoperative DFS: Liver hepatitis, Platelet count, Albumin, Indocyanine green (ICG), Multiplicity, Radiologic total tumor volume Postoperative DFS: Liver hepatitis, Platelet count, Multiplicity, Cirrhosis, Microvascular invasion, Pathologic total tumor volume | Multivariable Cox regression | Absent | Preoperative DFS: 0.636/0.65*  Postoperative DFS: 0.655/0.67* |
| Xu X48 | 2021 | 32852635 | OS | 84 | Including patients with hepatitis virus HCC (HBV and HCV) | Child–Pugh A; grade 1-4 | Liver transplantation or hepatic resection combined with intraoperative radiofrequency ablation | Hospital-based | AFP, Largest major tumor size, Treatment (hepatic resection and radiofrequency ablation), Microvascular invasion | Multivariable Cox regression | Absent | 0.802 |
| Zhou T49 | 2020 | 32760725 | OS | 571 (training cohort 199, internal validation cohort 132, external validation cohort 240) | Including patients with hepatitis virus HCC (HBV and HCV) | AJCC stage I-IV | - | TCGA and ICGC | Tumor stage, A 10-gene signature (YBX1, TTC26, SLC41A3, RCBTB2, PON1, MAPK7, INPP5B, CCDC134, C16orf71 and BMI1) | LASSO Cox regression | Absent | 0.732 |
| Li X50 | 2020 | 32561099 | OS | 807 (training cohort 545, external validation cohort 262) | Including patients with hepatitis virus HCC (HBV) | AJCC stage I-IV | Surgery, ablation, chemoembolization | Hospital-based | TNM stage, Microvascular invasion, AFP, Platelet to lymphocyte ratio (PLR), Prprothrombin time | Multivariable Cox regression | Present | 0.768 |
| Zhu HB51 | 2020 | 32490826 | RFS (clinical and radiomic signature factors), RFS (clinical factors) | 262 (training cohort 214, validation cohort 48) | Including patients with hepatitis virus HCC (HBV and HVC) | BCLC stage 0-B; Child–Pugh class A or B | Liver resection | Hospital-based and TCGA | RFS (clinical and radiomic signature factors): AFP, Tumor number, Tumor size, Radiomics signature score RFS (clinical factors): AFP, Tumor number, Tumor size | LASSO logistic regression | Absent | 0.800*, 0.716* |
| Hu K52 | 2020 | 32489476 | Risks of refractoriness after transarterial chemoembolization | 824 (training cohor 412, validation cohort 412) | Including patients with hepatitis virus HCC (HBV) | BCLC stage A or B; Child–Pugh class A and B | TACE | Hospital-based | Vascularization pattern, ALBI grade, AFP grade, GGT grade, Major tumor size | Multivariable logistic regression | Absent | 0.784* |
| Zhang Z53 | 2019 | 31754347 | OS | 551 (training cohor 348, validation cohort 203) | Including patients with hepatitis virus HCC (HBV and HVC) | AJCC stage I-IV |  | TCGA and GSE14520 | N4BP3, COL15A1, ADRA2B, NDST3, E2F8, MAPT, PZP and HOXD9 | LASSO Cox regression | Present | 0.765/0.810 (1-yr)*, 0.815 (2-yr)*, 0.796 (3-yr)* |
| Ho SY54 | 2020 | 31505104 | OS | 3690 (training cohor 1846, validation cohort 1844) | Including patients with hepatitis virus HCC (HBV and HVC) | BCLC stage 0-D | Liver resection, RFA, transplantation, TACE, targeted therapy, radiotherapy, supportive care | Hospital-based | Tumour burden, Performance status, Albumin‐bilirubin (ALBI) grade | Multivariable Cox regression | Absent | 0.77 |
| Zhang Z55 | 2019 | 31335995 | OS | 649 (training cohor 348, validation cohort 301) | Including patients with hepatitis virus HCC (HBV and HVC) | AJCC stage I-IV | - | TCGA, cBioPortal, GSE14520, GSE76427 | H2AFX, SQSTM1, ITM2A, PFKP, TPD52L1, ACSL4, STRN3, CPEB3 | Multivariable Cox regression | Present | 0.776 (1-yr)*, 0.745 (3-yr)*, 0.789 (5-yr)* |
| Zhang Z56 | 2019 | 31312112 | OS | 348 | Including patients with hepatitis virus HCC (HBV and HVC) | AJCC stage I-IV | - | TCGA | LINC00856, RP11_363N22.3, LINC02003, RP11_92C4.6, MYLK_AS1, C2orf48, RP11_150O12.3, LINC01116, RASGRF2_AS1, LINC01559 | Multivariable Cox regression | Absent | 0.761/0.811 (1-yr)*, 0.814 (3-yr)*, 0.796 (5-yr)* |
| Li W57 | 2019 | 31299011 | OS, DFS | 441 (training cohort 161, testing cohort 160, validation cohort 120) | Including patients with hepatitis virus HCC (HBV) | AJCC stage I-III | Hepatectomy | Hospital-based | OS: BCLC classification, Stromal type, Microvascular invasion, ALBI grade DFS: BCLC classification, Stromal type, Microvascular invasion, AFP | LASSO Cox regression | Absent | 0.686 (1-yr)*, 0.716 (3-yr)*, 0.705 (5-yr)*; 0.696 (1-yr)*, 0.715 (3-yr), 0.691 (5-yr)* |
| Sun J58 | 2019 | 31293636 | OS, DFS | 168 | Including patients with hepatitis virus HCC (HBV) | AJCC stage I-IV; BCLC stage 0-C | Radical resection | Hospital-based | OS: Tumor GCLC (Glutamate-cysteine ligase catalytic subunit) level, AFP, Tumor size, GGT DFS: Tumor GCLC (Glutamate-cysteine ligase catalytic subunit) level, AFP, Tumor size, GGT, CA199, Ascite | Multivariable Cox regression | Absent | 0.701, 0.707 |
| Wang X59 | 2019 | 31211449 | OS, RFS | 212 | Including patients with hepatitis virus HCC (HBV and HCV) | BCLC stage 0-C | - | GSE14520 | OS: AFP, Cirrhosis, BCLC stage, Tumor size, APOA4, APOC3, APOC4 RFS: Gender, Cirrhosis, BCLC staging, APOA4, APOC4 | Multivariable Cox regression | Absent | 0.675 (1-yr)*, 0.706 (2-yr), 0.687 (3-yr)*, 0.668 (4-yr)*, 0.667 (5-yr)*; 0.634 (1-yr)*, 0.606 (2-yr)*, 0.619 (3-yr)*, 0.584 (4-yr)*, 0.592 (5-yr)* |
| Liu GM60 | 2019 | 31139015 | OS | 165 | Including patients with hepatitis virus HCC (HBV and HCV) | AJCC stage I-IV | - | TCGA | Vascular tumor invasion, TNM stage, A six-gene signature (CSE1L, CSTB, MTHFR, DAGLA, MMP10 and GYS2) | LASSO Cox regression | Absent | 0.77/0.87 (1-yr)*, 0.78 (3-yr)*, 0.71 (5-yr)* |
| Huang K61 | 2019 | 31031855 | OS | 688 (Hospital-based 476, GSE14520 212) | Including patients with hepatitis virus HCC (HBV) | BCLC stage 0-C; Child–Pugh class A or B | Hepatectomy | Hospital-based, GSE14520 | OS: POR-rs1057868, AFP, Portal vein tumor thrombus (PVTT), BCLC Stage, Antiviral therapy OS: POR expression, BCLC Stage | Multivariable Cox regression | Absent | 0.67/0.68 |
| Wei J62 | 2019 | 30945699 | OS | 1399 (training cohort 1093, validation cohort306) | Including patients with hepatitis virus HCC (HBV and HCV) | AJCC stage I-IV; BCLC stage 0-C; Child-Pugh class A or B | Radical resection | Hospital-based | 5 SNPs (rs10893585, rs2431, rs34675408, rs6078460, rs6766361), TNM stage | Multivariable Cox regression | Absent | 0.723/0.766* |
| Wang Y63 | 2019 | 30913869 | RFS, OS | 889 (training cohort 457, internal validation cohort 197, external validation cohort 235) | Including patients with hepatitis virus HCC (HBV) | BCLC stage 0-C; Child–Pugh class A or B | Hepatectomy | Hospital-based | RFS: NLR (Neutrophil to lymphocyte ratio), GPR (Gamma-glutamyl transpeptidase to platelet ratio), INR (international normalized ratio), Microvascular invasion, Satellite lesions, Tumor number, Tumor diameter, Macrovascular invasion OS: GPR, TBIL (Total bilirubin), INR, AFP, Microvascular invasion, Satellite lesions, Tumor diameter, Macrovascular invasion | LASSO Cox regression | Present | 0.701, 0.761 |
| Kim JM64 | 2019 | 30671793 | RFS, OS | 420 | Including patients with hepatitis virus HCC (HBV) | Child–Pugh class A; Tumor grade 1-4 | Radical resection | Hospital-based | RFS: Tumor-free resection margin, Tumor number, PIVKA-II ( protein induced by vitaminK absence/antagonism-II), Albumin, PVTT (Portal vein tumor thrombosis), Intrahepatic metastasis, ALP (alkaline phosphatase), Tumor hemorrhage OS: ALT (Alanine transaminase), Tumor size, Tumor number | Multivariable Cox regression | Absent | 0.712, 0.819 |
| Ho SY65 | 2019 | 30401507 | RFS | 1038 | Including patients with hepatitis virus HCC (HBV and HCV) | ALBI grade 1-3 | Liver resection | Hospital-based | Tumor size, Tumor number, AFP, TTV (Total tumor volume), ALBI grade (Albumin-bilirubin grade) | Multivariable Cox regression | Absent | 0.607 |
| Wei WX66 | 2018 | 29935368 | OS | 360 | Including patients with hepatitis virus HCC (HBV and HCV) | BCLC inter-mediate-stage HCC | Partial hepatectomy and postoperative adjuvant TACE | Hospital-based | Esophageal and gastric varices, Microvascular invasion, Edmondson-Steiner classification, NDR score (tumor number-diameter- ratio of largest nodule diameter/smallest nodule diameter), Postoperative AFP change | Multivariable Cox regression | Absent | 0.71 |
| Zhou C67 | 2018 | 29905011 | OS, RFS | 182 | Including patients with hepatitis virus HCC (HBV) | AJCC stage I-IV; BCLC stage 0-C | Radical resection | Hospital-based | OS: WWOX expression (WW domain- containing oxidoreductase), AFP, Tumor size, GGT RFS: WWOX expression, AFP, Tumor size, GGT | Multivariable Cox regression | Absent | 0.685, 0.690 |
| Ling Q68 | 2018 | 29709370 | RFS | 1010 (training cohort 673, validation cohort 337) | Including patients with hepatitis virus HCC (HBV and HCV) | - | Liver transplantation | Hospital-based | CIT (Cold ischemia time), Tumor burden, AFP, Differentiation | Multivariable Cox regression | Absent | 0.762/0.773 (1-yr)*, 0.767 (2-yr)* |
| Hsu CY69 | 2017 | 29125877 | OS | 386 (training cohort 673, validation cohort 337) | Including patients with hepatitis virus HCC (HBV and HCV) | BCLC stage D | Liver resection, local ablation, transplantation, TACE, targeted therapy, supportive care | Hospital-based | Performance status, Child-Turcotte-Pugh class, Tumor burden, HBV, AFP | Multivariable Cox regression | Absent | 0.759 |
| Li C70 | 2017 | 29119530 | OS | 484 (training cohort 323, validation cohort 161) | Including patients with hepatitis virus HCC (HBV) | BCLC stage B or C; AJCC stage II or III | Liver resection | Hospital-based | AFP, Tumour number, Vp4 PVTT | Multivariable Cox regression | Absent | 0.831/0.845* |
| Li Y71 | 2017 | 28992879 | RFS | 256 | Including patients with hepatitis virus HCC (HBV) | Child-Pugh grade A | Liver resection or transplantation | Hospital-based | Albumin, TTV (Total tumor volume), Portal hypertention, HBV DNA | Multivariable Cox regression | Absent | 0.662/0.726 (3-yr)* |
| Hsu CY72 | 2017 | 28801646 | OS | 3371 (training cohort 2247, validation cohort 1124) | Including patients with hepatitis virus HCC (HBV and HCV) | BCLC stage 0-D | Liver resection, transplantation, ablation,TACE, targeted therapy (sorafenib), supportive care | Hospital-based | Performace status, Child-Turcotte-Pugh (CTP) class, Tumor burden, Treatment (Curative treatment, TACE, Targeted therapy, Supportive care) | Multivariable Cox regression | Absent | 0.774 |
| Kao WY73 | 2017 | 28562211 | OS | 622 | Including patients with hepatitis virus HCC (HBV and HCV) | Child-Pugh grade A or B; BCLC stage 0-B | RFA | Hospital-based | Tumor number, ALBI grade (Albumin-bilirubin), Age, AFP, PTINR (Prothrombin time international normalized ratio) | Multivariable Cox regression | Absent | 0.77 |
| Notake T74 | 2017 | 28303401 | OS | 564 (training cohort 268, validation cohort 296) | Including patients with hepatitis virus HCC (HBV and HCV) | Child-Pugh grade A or B | Hepatectomy, TACE, RFA, supportive care | Hospital-based | Macroscopic vascular invasion, Treatment (Resection, Percutaneous ablation, TACE, Others), JIS score (Japan Integrated Score), Type of treatment for recurrence, Time to recurrence | Multivariable Cox regression | Present | 0.75 |
| Hsu CY75 | 2016 | 26972815 | OS | 3179 (training cohort 2119, validation cohort 1060) | Including patients with hepatitis virus HCC (HBV and HCV) | Child-Pugh grade A-C; BCLC stage 0-D | - | Hospital-based | Performace status, CTP (Child-Turcotte-Pugh) class, Tumor burden | Multivariable Cox regression | Absent | 0.766 |
| Liu PH76 | 2015 | 26512576 | RFS | 383 | Including patients with hepatitis virus HCC (HBV and HCV) | BCLC stage 0-C | Liver resection or RFA | Hospital-based | Tumor number, Tumor size, Albumin, MELD score (Model for End-stage Liver Disease), Platelet count | Multivariable Cox regression | Absent | 0.69 |
| Hsu CY77 | 2016 | 26487000 | OS | 1009 (training cohort 505, validation cohort 504) | Including patients with hepatitis virus HCC (HBV and HCV) | Child-Pugh grade A | Resection or TACE | Hospital-based | Treatment (Resection, TACE), Albumin, Vascular invasion, TTV (Total tumor volume), AFP, Tumor number | Multivariable Cox regression | Absent | 0.694 |

* AUC (the area under the curve) values.

Reference

1 Sheng R, Jin K, Sun W, et al. Prediction of therapeutic response of advanced hepatocellular carcinoma to combined targeted immunotherapy by MRI. Magn Reson Imaging. 2023, 96:1-7.

2 Li W, Shen H, Han L, et al. A multiparametric fusion radiomics signature based on contrast-enhanced MRI for predicting early recurrence of hepatocellular carcinoma. J Oncol. 2022, 2022:3704987.

3 Liu H, Qin X, Xu Z, et al. Comparison of effectiveness and safety of camrelizumab between HBV-related and non-B, non-C hepatocellular carcinoma: A retrospective study in China. Front Genet. 2022, 13:1000448.

4 Jin Z, Wang M, Meng Y, et al. Prognostic implication of a cuproptosis-related miRNA signature in hepatocellular carcinoma. J Healthc Eng. 2022, 2022:4694323.

5 Zhang S, Xu L, Dai F, et al. Construction of a predictive nomogram and bioinformatic investigation of the potential mechanism of postoperative early recurrence of hepatocellular carcinoma meeting the Milan criteria. Ann Transl Med. 2022, 10(16):866.

6 Yan H, Chen S, Qiong Y, et al. Preoperative prealbumin-to-fibrinogen ratio to predict survival outcomes in hepatocellular carcinoma patients after hepatic resection. J Med Biochem. 2022, 41(3):290-298.

7 Wang K, Xiang Y, Yan J, et al. A deep learning model with incorporation of microvascular invasion area as a factor in predicting prognosis of hepatocellular carcinoma after R0 hepatectomy. Hepatol Int. 2022, 16(5):1188-1198.

8 Shan Y, Yu X, Yang Y, et al. Nomogram for the preoperative prediction of the macrotrabecular-massive subtype of hepatocellular arccinoma. J Hepatocell Carcinoma. 2022, 9:717-728.

9 Tao H, Wang C, Lu C, et al. Comprehensive analysis on the specific role and function of mitochondrial inner membrane protein MPV17 in liver hepatocellular carcinoma. Genet Res (Camb). 2022, 2022:7236823.

10 Zhang H, Du X, Dong H, et al. Risk factors and predictive nomograms for early death of patients with advanced hepatocellular carcinoma: a large retrospective study based on the SEER database. BMC Gastroenterol. 2022, 22(1):348.

11 Ji K, Zhu H, Wu W, et al. Tumor response and nomogram-based prognostic stratification for hepatocellular carcinoma after drug-eluting beads transarterial chemoembolization. J Hepatocell Carcinoma. 2022, 9:537-551.

12 Fang T, Long G, Mi X, et al. Splenic volume, an easy-to-use predictor of HCC late recurrence for HCC patients after hepatectomy. Front Oncol. 2022, 12:876668.

13 Fu Y, Yang Z, Hu Z, et al. Preoperative serum ctDNA predicts early hepatocellular carcinoma recurrence and response to systemic therapies. Hepatol Int. 2022, 16(4):868-878.

14 Gu J, Liang BY, Zhang EL, et al. Prognostic nomograms based on the cirrhotic severity scoring for preoperative prediction of long-term outcomes in patients with HBV-related hepatocellular carcinoma and Child-Pugh Grade A liver function. J Oncol. 2022, 2022:7031674.

15 Dai K, Liu C, Guan G, et al. Identification of immune infiltration-related genes as prognostic indicators for hepatocellular carcinoma. BMC Cancer. 2022, 22(1):496.

16 Liu H, Yang M, Dong Z. HSPB11 is a Prognostic biomarker associated with immune infiltrates in hepatocellular carcinoma. Int J Gen Med. 2022, 15:4017-4027.

17 Yang Y, Gao L, Chen J, et al. Lamin B1 is a potential therapeutic target and prognostic biomarker for hepatocellular carcinoma. Bioengineered. 2022, 13(4):9211-9231.

18 Yan H, Wang X, Zhou D, et al. Dynamic nomogram for predicting macrovascular invasion of patients with unresectable hepatocellular carcinoma after transarterial chemoembolization. J Cancer. 2022, 13(6):1914-1922.

19 Xu X, Sun S, Liu Q, et al. Preoperative application of systemic inflammatory biomarkers combined with MR imaging features in predicting microvascular invasion of hepatocellular carcinoma. Abdom Radiol (NY). 2022, 47(5):1806-1816.

20 Zhang X, Xin Y, Yang Y, et al. Aspartate aminotransferase-to-platelet ratio index for predicting late recurrence of hepatocellular carcinoma after radiofrequency ablation. Int J Hyperthermia. 2022, 39(1):437-445.

21 Chen X, Lu Y, Shi X, et al. Development and validation of a novel model to predict regional lymph node metastasis in patients with hepatocellular carcinoma. Front Oncol. 2022, 12:835957.

22 Zhou T, Wang T, Zeng K, et al. A nomogram based on a three pyroptosis gene model and clinical parameters for predicting prognosis of hepatocellular carcinoma. Gene. 2022, 819:146243.

23 Xin Y, Zhang X, Yang Y, et al. Prediction of late recurrence after radiofrequency ablation of HBV-related hepatocellular carcinoma with the age-male-albumin-bilirubin-platelets (aMAP) risk score: a multicenter study. J Gastrointest Oncol. 2021, 12(6):2930-2942.

24 Wang H, Lu Y, Liu R, et al. A non-invasive nomogram for preoperative prediction of microvascular invasion risk in hepatocellular carcinoma. Front Oncol. 2021, 11:745085.

25 Sun T, Li R, Qiu Y, et al. New thresholds for AFP and Des-γ-Carboxy Prothrombin in chronic liver disease depending on the use of nucleoside analogs and an integrated nomogram. Int J Gen Med. 2021, 14:6149-6165.

26 Ye D, Qu J, Wang J, et al. A new clinical nomogram from the TCGA database to predict the prognosis of hepatocellular carcinoma. Front Oncol. 2021, 11:698980.

27 Wang Z, Fu Y, Xia A, et al. Prognostic and predictive role of a metabolic rate-limiting enzyme signature in hepatocellular carcinoma. Cell Prolif. 2021, 54(10):e13117.

28 Zheng Y, Zhang X, Lu J, et al. Association between socioeconomic status and survival in patients with hepatocellular carcinoma. Cancer Med. 2021, 10(20):7347-7359.

29 Chen Y, Zhao J, Zhang Z, et al. Construction and validation of a nomogram for predicting the risk of deep vein thrombosis in hepatocellular carcinoma patients after laparoscopic hepatectomy: a retrospective study. J Hepatocell Carcinoma. 2021, 8:783-794.

30 Zheng Y, Cheng Y, Zhang C, et al. Co-amplification of genes in chromosome 8q24: a robust prognostic marker in hepatocellular carcinoma. J Gastrointest Oncol. 2021, 12(3):1086-1100.

31 Lu Z, Sun Z, Liu C, et al. Prognostic nomogram for hepatocellular carcinoma with radiofrequency ablation: a retrospective cohort study. BMC Cancer. 2021, 21(1):751.

32 Yang M, Wu X, Li L, et al. COMMD10 inhibits tumor progression and induces apoptosis by blocking NF-κB signal and values up BCLC staging in predicting overall survival in hepatocellular carcinoma. Clin Transl Med. 2021, 11(5):e403.

33 Li L, Xie R, Lu G. Identification of m6A methyltransferase-related lncRNA signature for predicting immunotherapy and prognosis in patients with hepatocellular carcinoma. Biosci Rep. 2021, 41(6):BSR20210760.

34 Liao C, Li G, Bai Y, et al. Prognostic value and association of sarcopenic obesity and systemic inflammatory indexes in patients with hepatocellular carcinoma following hepatectomy and the establishment of novel predictive nomograms. J Gastrointest Oncol. 2021, 12(2):669-693.

35 Li TE, Zhang Z, Wang Y, et al. A novel immunotype-based risk stratification model predicts postoperative prognosis and adjuvant TACE benefit in Chinese patients with hepatocellular carcinoma. J Cancer. 2021, 12(10):2866-2876.

36 Ma E, Li J, Xing H, et al. Development of a predictive nomogram for early recurrence of hepatocellular carcinoma in patients undergoing liver transplantation. Ann Transl Med. 2021, 9(6):468.

37 Bai Y, Lian Y, Wu J, et al. A prognostic scoring system for predicting overall survival of patients with the TNM 8th edition stage I and II hepatocellular carcinoma after surgery: a population-based study. Cancer Manag Res. 2021, 13:2131-2142.

38 Zeng H, Liu C, Zhou X, et al. A new prognostic strategy based on four DNA repair-associated lncRNAs for hepatocellular carcinoma. Comb Chem High Throughput Screen. 2022, 25(5):906-918.

39 Dai T, Deng M, Ye L, et al. Nomograms based on clinicopathological factors and inflammatory indicators for prediction of early and late recurrence of hepatocellular carcinoma after surgical resection for patients with chronic hepatitis B. Ann Transl Med. 2021, 9(1):12.

40 Yan B, Su BB, Bai DS, et al. A practical nomogram and risk stratification system predicting the cancer-specific survival for patients with early hepatocellular carcinoma. Cancer Med. 2021, 10(2):496-506.

41 Zhou Y, Ding J, Qin Z, et al. Predicting the survival rate of patients with hepatocellular carcinoma after thermal ablation by nomograms. Ann Transl Med. 2020, 8(18):1159.

42 Zhang Q, Sun L, Zhang Q, et al. Construction of a disease-specific lncRNA-miRNA-mRNA regulatory network reveals potential regulatory axes and prognostic biomarkers for hepatocellular carcinoma. Cancer Med. 2020, 9(24):9219-9235.

43 Yang J, Bao Y, Chen W, et al. Nomogram based on systemic immune inflammation index and prognostic nutrition index predicts recurrence of hepatocellular carcinoma after surgery. Front Oncol. 2020, 10:551668.

44 Zeng J, Zeng J, Wu Q, et al. Novel inflammation-based prognostic nomograms for individualized prediction in hepatocellular carcinoma after radical resection. Ann Transl Med. 2020, 8(17):1061.

45 Shi JY, Sun LY, Quan B, et al. A novel online calculator based on noninvasive markers (ALBI and APRI) for predicting post-hepatectomy liver failure in patients with hepatocellular carcinoma. Clin Res Hepatol Gastroenterol. 2021, 45(4):101534.

46 Zhou C, Weng J, Liu C, et al. High RPS3A expression correlates with low tumor immune cell infiltration and unfavorable prognosis in hepatocellular carcinoma patients. Am J Cancer Res. 2020, 10(9):2768-2784.

47 Lai Y, Lee JC, Hung HC, et al. Models to predict disease-free survival for hepatocellular carcinoma patients with surgical resections. J Surg Oncol. 2020, 122(7):1444-1452.

48 Xu X, Pu X, Jiang L, et al. Living donor liver transplantation or hepatic resection combined with intraoperative radiofrequency ablation for Child-Pugh A hepatocellular carcinoma patient with Multifocal Tumours Meeting the University of California San Francisco (UCSF) criteria. J Cancer Res Clin Oncol. 2021, 147(2):607-618.

49 Zhou T, Cai Z, Ma N, et al. A novel ten-gene signature predicting prognosis in hepatocellular carcinoma. Front Cell Dev Biol. 2020, 8:629.

50 Li X, Huang H, Yu X, et al. A novel prognostic nomogram based on microvascular invasion and hematological biomarkers to predict survival outcome for hepatocellular carcinoma patients. Surg Oncol. 2020, 33:51-57.

51 Zhu HB, Zheng ZY, Zhao H, et al. Radiomics-based nomogram using CT imaging for noninvasive preoperative prediction of early recurrence in patients with hepatocellular carcinoma. Diagn Interv Radiol. 2020, 26(5):411-419.

52 Hu K, Lu S, Li M, et al. A novel pre-treatment model predicting risk of developing refractoriness to transarterial chemoembolization in unresectable hepatocellular carcinoma. J Cancer. 2020, 11(15):4589-4596.

53 Zhang Z, Li J, He T, et al. Two predictive precision medicine tools for hepatocellular carcinoma. Cancer Cell Int. 2019, 19:290.

54 Ho SY, Hsu CY, Liu PH, et al. Albumin-bilirubin grade-based nomogram of the BCLC system for personalized prognostic prediction in hepatocellular carcinoma. Liver Int. 2020, 40(1):205-214.

55 Zhang Z, Li J, He T, et al. The competitive endogenous RNA regulatory network reveals potential prognostic biomarkers for overall survival in hepatocellular carcinoma. Cancer Sci. 2019, 110(9):2905-2923.

56 Zhang Z, Ouyang Y, Huang Y, et al. Comprehensive bioinformatics analysis reveals potential lncRNA biomarkers for overall survival in patients with hepatocellular carcinoma: an on-line individual risk calculator based on TCGA cohort. Cancer Cell Int. 2019, 19:174.

57 Li W, Han J, Yuan K, et al. Integrated tumor stromal features of hepatocellular carcinoma reveals two distinct subtypes with prognostic/predictive significance. Aging (Albany NY). 2019, 11(13):4478-4509.

58 Sun J, Zhou C, Ma Q, et al. High GCLC level in tumor tissues is associated with poor prognosis of hepatocellular carcinoma after curative resection. J Cancer. 2019, 10(15):3333-3343.

59 Wang X, Gong Y, Deng T, et al. Diagnostic and prognostic significance of mRNA expressions of apolipoprotein A and C family genes in hepatitis B virus-related hepatocellular carcinoma. J Cell Biochem. 2019, 120(10):18246-18265.

60 Liu GM, Zeng HD, Zhang CY, et al. Identification of a six-gene signature predicting overall survival for hepatocellular carcinoma. Cancer Cell Int. 2019, 19:138.

61 Huang K, Liao X, Han C, et al. Genetic variants and expression of cytochrome p450 oxidoreductase predict postoperative survival in patients with hepatitis B virus-related hepatocellular Carcinoma. J Cancer. 2019, 10(6):1453-1465.

62 Wei J, Sheng Y, Li J, et al. Genome-wide association study identifies a genetic prediction model for postoperative survival in patients with hepatocellular carcinoma. Med Sci Monit. 2019, 25:2452-2478.

63 Wang Y, Sun K, Shen J, et al. Novel prognostic nomograms based on inflammation-related markers for patients with hepatocellular carcinoma underwent hepatectomy. Cancer Res Treat. 2019, 51(4):1464-1478.

64 Kim JM, Kwon CHD, Joh JW, et al. Nomograms in hepatectomy patients with hepatitis B virus-related hepatocellular carcinoma. J Gastrointest Surg. 2019, 23(8):1559-1567.

65 Ho SY, Hsu CY, Liu PH, et al. Albumin-bilirubin (ALBI) grade-based nomogram to predict tumor recurrence in patients with hepatocellular carcinoma. Eur J Surg Oncol. 2019, 45(5):776-781.

66 Wei WX, Yang ZS, Lu LH, et al. Long-term survival after partial hepatectomy for sub-stage patients with intermediate stage hepatocellular carcinoma. Int J Surg. 2018, 56:256-263.

67 Zhou C, Chen W, Sun J, et al. Low expression of WW domain-containing oxidoreductase associates with hepatocellular carcinoma aggressiveness and recurrence after curative resection. Cancer Med. 2018, 7(7):3031-3043.

68 Ling Q, Liu J, Zhuo J, et al. Development of models to predict early post-transplant recurrence of hepatocellular carcinoma that also integrate the quality and characteristics of the liver graft: A national registry study in China. Surgery. 2018, S0039-6060(18)30079-5.

69 Hsu CY, Liu PH, Ho SY, et al. Impact of tumor burden on prognostic prediction for patients with terminal stage hepatocellular carcinoma: A nomogram study. PLoS One. 2017, 12(11):e0188031.

70 Li C, Shen JY, Zhang XY, et al. Predictors of futile liver resection for patients with barcelona clinic liver cancer stage B/C hepatocellular carcinoma. J Gastrointest Surg. 2018, 22(3):496-502.

71 Li Y, Ruan DY, Jia CC, et al. Surgical resection versus liver transplantation for hepatocellular carcinoma within the Hangzhou criteria: a preoperative nomogram-guided treatment strategy. Hepatobiliary Pancreat Dis Int. 2017, 16(5):480-486.

72 Hsu CY, Liu PH, Hsia CY, et al. A new treatment-integrated prognostic nomogram of the Barcelona Clinic Liver Cancer System for hepatocellular carcinoma. Sci Rep. 2017, 7(1):7914.

73 Kao WY, Su CW, Chiou YY, et al. Hepatocellular carcinoma: nomograms based on the Albumin-Bilirubin Grade to assess the outcomes of radiofrequency ablation. Radiology. 2017, 285(2):670-680.

74 Notake T, Kobayashi A, Shinkawa H, et al. Nomogram predicting long-term survival after the diagnosis of intrahepatic recurrence of hepatocellular carcinoma following an initial liver resection. Int J Clin Oncol. 2017, 22(4):715-725.

75 Hsu CY, Liu PH, Hsia CY, et al. Nomogram of the Barcelona Clinic Liver Cancer system for individual prognostic prediction in hepatocellular carcinoma. Liver Int. 2016, 36(10):1498-1506.

76 Liu PH, Hsu CY, Lee YH, et al. When to perform surgical resection or radiofrequency ablation for early hepatocellular carcinoma?: a nomogram-guided treatment strategy. Medicine (Baltimore). 2015, 94(43):e1808.

77 Hsu CY, Liu PH, Hsia CY, et al. Surgical resection is better than transarterial chemoembolization for patients with hepatocellular carcinoma beyond the Milan Criteria: a prognostic nomogram study. Ann Surg Oncol. 2016, 23(3):994-1002.
